# Supplementary material for: Cholangitis and Interruptions of Neoadjuvant Chemotherapy Associate with Reduced Overall and Progression-Free Survival in Pancreatic Cancer
Source: Springer Nature journal article supplement (doi:10.1245/s10434-023-14793-6), 2023-12-28
Supplement: MOESM1 [file 26571246]

**Supplemental Table 1.** Neoadjuvant (a) and adjuvant chemotherapy (b) and radiotherapy regimens patients received. Some patients received chemotherapy in other hospital districts and, thus, information regarding the type of chemotherapy received is unknown.

Abbreviations: NAT, neoadjuvant chemotherapy; n, number of patients; GEM, gemcitabine; CAP, capecitabine; CIS, cisplatin; Nab-PTX, nanoparticle albumin-bound paclitaxel; PTX, paclitaxel; ERL, erlotinib; OXA, oxaliplatin; CAR, carboplatin; n/a, not applicable.

**a**

| <b>NAT category</b> | <b>Chemotherapy regimen</b> | <b>n</b> | <b>Cycles</b> | <b>Radiotherapy (n)</b> |
|---------------------|-----------------------------|----------|---------------|-------------------------|
| GEM alone           | GEM                         | 13       | 3             | 2                       |
|                     | GEM                         | 2        | 4             | 1                       |
|                     | GEM                         | 1        | 5             | 0                       |
|                     | GEM                         | 1        | 8             | 0                       |
|                     | GEM                         | 1        | 9             | 0                       |
| GEM combination     | GEM + CAP                   | 1        | 2             | 0                       |
|                     | GEM + CAP                   | 3        | 3             | 0                       |
|                     | GEM + CAP                   | 1        | 4             | 0                       |
|                     | GEM + CAP                   | 1        | 5             | 1                       |
|                     | GEM + CIS                   | 1        | 1             | 0                       |
|                     | GEM + CIS                   | 16       | 3             | 1                       |
|                     | GEM + CIS                   | 10       | 4             | 3                       |
|                     | GEM + CIS                   | 1        | 5             | 0                       |
|                     | GEM + CIS                   | 1        | 6             | 0                       |
|                     | GEM + CIS                   | 1        | 7             | 0                       |
|                     | GEM + Nab-PTX               | 1        | 1             | 0                       |
|                     | GEM + Nab-PTX               | 8        | 2             | 1                       |
|                     | GEM + Nab-PTX               | 18       | 3             | 4                       |
|                     | GEM + Nab-PTX               | 3        | 4             | 0                       |
|                     | GEM + Nab-PTX               | 2        | 5             | 0                       |
|                     | GEM + Nab-PTX               | 1        | 7             | 1                       |
|                     | GEM + Nab-PTX               | 1        | 10            | 0                       |
|                     | GEM + PTX                   | 3        | 2             | 1                       |

|            |                           |    |      |     |
|------------|---------------------------|----|------|-----|
|            | GEM + PTX                 | 2  | 3    | 0   |
|            | GEM + PTX                 | 2  | 4    | 0   |
|            | GEM + OXA                 | 1  | 6    | 1   |
|            | GEM + CIS; GEM            | 1  | 3; 3 | 1   |
|            | GEM + Nab-PTX; GEM        | 1  | 2; 1 | 1   |
|            | GEM + Nab-PTX; GEM        | 1  | 5; 1 | 0   |
|            | GEM; GEM + Nab-PTX        | 1  | 1; 2 | 0   |
|            | GEM; GEM + Nab-PTX        | 1  | 1; 4 | 1   |
|            | GEM; GEM + Nab-PTX        | 1  | 2; 1 | 0   |
|            | GEM; GEM + CIS            | 1  | 2; 3 | 1   |
| FOLFIRINOX | FOLFIRINOX                | 1  | 1    | 0   |
|            | FOLFIRINOX                | 1  | 2    | 0   |
|            | FOLFIRINOX                | 8  | 3    | 0   |
|            | FOLFIRINOX                | 10 | 4    | 0   |
|            | FOLFIRINOX                | 6  | 5    | 1   |
|            | FOLFIRINOX                | 2  | 6    | 0   |
|            | FOLFIRINOX                | 2  | 7    | 0   |
|            | FOLFIRINOX                | 2  | 8    | 0   |
|            | FOLFIRINOX                | 2  | 9    | 0   |
|            | FOLFIRINOX                | 1  | 10   | 1   |
|            | FOLFIRINOX lite           | 1  | 2    | 0   |
|            | FOLFIRINOX lite           | 1  | 3    | 0   |
|            | FOLFIRINOX lite           | 1  | 4    | 0   |
|            | FOLFIRINOX lite           | 2  | 5    | 2   |
|            | FOLFIRINOX; GEM           | 1  | 4; 3 | 0   |
|            | FOLFIRINOX; GEM + Nab-PTX | 1  | 1; 3 | 0   |
|            | FOLFIRINOX; Nab-PTX       | 1  | 1; 4 | 0   |
| Other      | CAR + PTX                 | 2  | 3    | 1   |
|            | Nab-PTX; GEM              | 1  | 1; 2 | 0   |
| Unknown    | Unknown                   | 13 | n/a  | n/a |

**b**

| <b>Adjuvant category</b> | <b>Chemotherapy regimen</b> | <b>n</b> |
|--------------------------|-----------------------------|----------|
| GEM alone                | GEM                         | 40       |
| GEM combination          | GEM + CAP                   | 23       |
|                          | GEM + CIS                   | 14       |
|                          | GEM+ ERL                    | 2        |
|                          | GEM + Nab-PXT               | 10       |
|                          | GEM + PXT                   | 3        |
| FOLFIRINOX               | FOLFIRINOX                  | 7        |
|                          | FOLFIRINOX lite             | 7        |
|                          | FOLFIRINOX; GEM             | 1        |
| Other                    | OXA + CAP; ERL              | 1        |
| No adjuvant treatment    | n/a                         | 34       |
| Unknown                  | n/a                         | 20       |
